# Supplementary material
Source: publisher figshare collection journal article supplement (https://gsapubs.figshare.com/articles/dataset/_/18070325)
Supplement: Supplementary file 1 [file 1]

Jérémie Soldner, Chao Yuan, Karel Schulmann, Yingde Jiang, Pavla Štípská, Yunying Zhang, Zongying Huang, and Xinyu Wang, 2021, Early Paleozoic Cascadia-type active-margin evolution of the Dunhuang block (NW China): Geochemical and geochronological constraints: GSA Bulletin, <https://doi.org/10.1130/B36220.1>.

## Supplemental Material

**Text S1.** Analytical Methods

**Table S1.** U–Pb LA–ICP–MS data for zircons from granulite and amphibolite.

**Table S2.** U–Pb LA–ICP–MS data for zircons from metapelite and metapsammite.

**Table S3.** Zircon trace-element compositions from granulite and amphibolite.

**Table S4.** Hf isotopic compositions for zircons from granulite and amphibolite.

### SUPPLEMENTAL MATERIAL S1. ANALYTICAL METHODS

#### Whole-Rock Major and Trace-Elements

Whole-rock major and trace-element concentrations analyses were determined at the State Key Laboratory of Isotope Geochemistry (SKLaBIG), Guangzhou Institute of Geochemistry Chinese Academy of Sciences (GIG-CAS). Samples for whole-rock analyses were crushed and pulverized in an agate mill ~200 mesh grain size. Major element (wt%) analyses were determined on fused glass disks of ~50 mg rock-powder and ~4.0 g Li<sub>2</sub>B<sub>4</sub>O<sub>7</sub> flux using Rigaku ZSX100e X-ray fluorescence spectrometer. Loss on ignition (LOI) was determined by the weight difference after ignition at 950 °C. Analytical precision for most major elements is within 1%–5%. The detailed analytical procedures described by Li X.H. et al. (2002). Trace element analyses were performed using a Perkin-Elmer Sciex ELAN 6000 ICP-MS instrument. Sample powders (~50 mg) were digested with mixed HNO<sub>3</sub> and HF acid in steel-bomb coated Teflon beakers for 48h in order to ensure complete dissolution of refractory minerals. USGS rock standards G-2, W-2, MRG-1 and AGV-1 and Chinese national standards GSD-12, GSR-1, GSR-2 and GSR-3 were used to calibrate the trace element concentrations of the measured samples. Analytical precision was generally better than 5%.

The low chemical index of alteration (CIA) of metasediments has been calculated as follows:  $CIA = Al_2O_3 / (Al_2O_3 + CaO + Na_2O + K_2O) \times 100$ . The index of compositional variability (ICV) used to discuss maturity of metasediments has been calculated as follows:  $ICV = (Fe_2O_3 + K_2O + Na_2O + CaO + MgO + TiO_2) / Al_2O_3$ .

#### Sr–Nd Isotopic Analysis

Sr–Nd isotopic analyses were performed on a Micromass Isoprobe multi-collector mass spectrometer (MC-ICP-MS) at the SKLaBIG, GIG-CAS, using the analytical procedures described in Li X.H. et al. (2004). Cation columns were used for separation of REE and Sr. Nd fractions were further separated using HDEHP-coated Kef columns. Measured <sup>87</sup>Sr/<sup>86</sup>Sr and

$^{143}\text{Nd}/^{144}\text{Nd}$  ratios were normalized to  $^{86}\text{Sr}/^{88}\text{Sr} = 0.1194$  and  $^{146}\text{Nd}/^{144}\text{Nd} = 0.7219$ , respectively. Reported  $^{87}\text{Sr}/^{86}\text{Sr}$  and  $^{143}\text{Nd}/^{144}\text{Nd}$  ratios were adjusted to the NBS SRM 987 standard  $^{87}\text{Sr}/^{86}\text{Sr} = 0.710256 \pm 22$  ( $2\sigma$ ) and the Shin Etsu JNdi-1 standard  $^{143}\text{Nd}/^{144}\text{Nd} = 0.512110 \pm 8$  ( $2\sigma$ ).

## **Zircon U–Pb Dating**

Zircons were separated using conventional heavy liquid and magnetic separation techniques before being handpicked under binocular microscope. Zircon grains were mounted in epoxy resin disk and polished at about half grain size prior to analysis. Cathodoluminescence (CL) images of zircon were obtained at the SKLaBIG, GIG-CAS using a JEOL JXA-8100 electron probe micro-analyzer fitted with a Mono CL3 CL System for high-resolution imaging and spectrometry.

U–Pb dating of zircon was measured with an ELEMENT XR (Thermo Fisher Scientific) ICP-SF-MS coupled with a 193-nm (ArF) Resonetics RESOLUTION M-50 laser ablation system at the SKLaBIG, GIG-CAS. The detailed experiment procedure and data reduction strategy are described in Zhang L. et al. (2018). Laser condition was set as following: beam size, 33  $\mu\text{m}$ ; repetition rate, 6Hz; energy density,  $\sim 4$  J  $\text{cm}^{-2}$ . A smoothing device (The Squid, Laurin Technic) was used to smooth the sample signal. Each spot analysis consisted of 20 s gas blank collection with the laser off, and 30 s sample signal detection with the laser on. Signals of the following masses were detected:  $^{202}\text{Hg}$ ,  $^{204}(\text{Hg}+\text{Pb})$ ,  $^{206}\text{Pb}$ ,  $^{207}\text{Pb}$ ,  $^{208}\text{Pb}$ ,  $^{232}\text{Th}$  and  $^{238}\text{U}$ . The oxide molecular yield, indicated by the  $^{238}\text{U}^{16}\text{O}/^{238}\text{U}$  ratio, was less than 0.3%. Zircon Plešovice (Sláma et al., 2008) was selected as the calibration standard and every five sample analyses were followed with two analyses of Plešovice. Zircon 91500 (Wiedenbeck et al., 1995) was measured as unknown to evaluate the analytical precision and accuracy. 20 analyses of 91500 yield an average  $^{206}\text{Pb}/^{238}\text{U}$  age of  $1060.5 \pm 10$  Ma, agreeing well with the ID-TIMS value. Off-line inspection and integration of background and analysis signals as well as time-drift correction and quantitative calibration for trace element analyses and U–Pb dating were performed using the Glitter software version 4.0 of the Macquarie University.

Zircon U–Pb dating and zircon trace-elements of granulite and amphibolite was performed using LA-ICP-MS at Key Laboratory of Mineralogy and Metallogeny (KLaBMM) at the GIG-CAS using a Resonetic 193 nm ArF excimer laser, operated at a constant energy of 80 mJ, with a repetition rate of 8Hz and a spot size of 30  $\mu\text{m}$ . Helium was used as a carrier gas to transport the ablated material from the standard laser-ablation cell and then mixed with Ar gas via a mixing chamber before entering into the ICP-MS torch. Each spot analysis consisted of  $\sim 30$  s background acquisition and  $\sim 40$  s of sample data acquisition. Zircon Plešovice and NIST SRM 610 were used as external standard for age calculations and concentrations calculations respectively. Each block of 8 sample analyses was bracketed by external standard analysis. Off-line inspection and integration of background and analysis signals as well as time-drift correction and quantitative calibration for trace element analyses and U–Pb dating were performed using ICPMSDataCal software (Liu Y.S. et al., 2008, 2010). The detailed analytical technique can be found in Li Q. et al. (2011).

Age calculations, concordia diagrams and weighted mean calculations were performed using Isoplot/Ex (Ludwig, 2003).

## **Zircon Hf isotopic composition**

All zircon Hf isotope analyses in this study were performed on a Neptune Plus MC-ICP-MS (Thermo Scientific), coupled with a RESolution M-50 193 nm laser ablation system (Resonetics), which are hosted at the SKLaBIG, GIG-CAS. The detailed description of the two instruments can be found in Zhang L. et al. (2014). An X-skimmer cone in the interface was used to improve the instrumental sensitivity. All isotope signals are detected with Faraday cups under static mode. The laser parameters were set as follow: beam diameter, 45  $\mu\text{m}$ ; repetition rate, 6 Hz; energy density,  $\sim 4 \text{ J cm}^{-2}$ . Helium was chosen as the carrier gas (800  $\text{ml} \cdot \text{min}^{-1}$ ). A “squid” smoothing device on the gas line to the ICP gives a smooth signal. Each analysis consisted of 400 cycles with an integration time of 0.131 s per cycle. The first 28 s was used to detect the gas blank with the laser beam off, followed by 30 s laser ablation for sample signals collection with laser beam on. During the measurement of this study, the gas blank of  $^{180}\text{Hf}$  was less than 0.2 mv.  $^{173}\text{Yb}$  and  $^{175}\text{Lu}$  were used to correct the isobaric interference of  $^{176}\text{Yb}$  and  $^{176}\text{Lu}$  on  $^{176}\text{Hf}$ . The natural ratio values of  $^{176}\text{Yb}/^{173}\text{Yb}$  and  $^{176}\text{Lu}/^{175}\text{Lu}$  used in the correction are 0.79381 (Segal et al., 2003) and 0.02656 (Wu et al., 2006). The mass bias factor of Yb is calculated from the measured  $^{173}\text{Yb}/^{171}\text{Yb}$  and the natural ratio of 1.13268. The mass bias factor of Lu is assumed to be the same as that of Yb. The mass bias of  $^{176}\text{Hf}/^{177}\text{Hf}$  was normalized to  $^{179}\text{Hf}/^{177}\text{Hf} = 0.7325$  with an exponential law. The detailed data reduction procedure is reported in Zhang L. et al. (2015). 40 analyses of the Plešovice zircon during the course of this study yielded a weighted mean of  $^{176}\text{Hf}/^{177}\text{Hf} = 0.282483 \pm 0.000035$  (2SD), which is consistent within errors with the reported value in Sláma et al. (2008).

## REFERENCES CITED

- Li, X.H., Zhou, H., Chung, S.L., Lo, C.H., Wei, G., Liu, Y., and Lee, C.Y., 2002, Geochemical Sr-Nd isotopic characteristics of late Paleogene ultrapotassic magmatism in south-eastern Tibet: *International Geology Review*, v. 44, p. 559–574, <https://doi.org/10.2747/0020-6814.44.6.559>.
- Li, X.H., Liu, D.Y., Sun, M., Li, W.X., Liang, X.R., and Liu, Y., 2004, Precise Sm–Nd and U–Pb isotopic dating of the super-giant Shizhuyuan polymetallic deposit and its host granite, Southeast China: *Geological Magazine*, v. 141, p. 225–231, <https://doi.org/10.1017/S0016756803008823>.
- Li, Q., Lin, W., Su, W., Li, X., Shi, Y., Liu, Y., and Tang, G., 2011, SIMS U–Pb rutile age of low temperature eclogites from southwestern Chinese Tianshan, NW China: *Lithos*, v. 122, p. 76–86, <https://doi.org/10.1016/j.lithos.2010.11.007>.
- Liu, Y.S., Hu, Z.C., Gao, S., Günther, D., Xu, J., Gao, C.G., and Chen, H.H., 2008, In situ analysis of major and trace elements of anhydrous minerals by LA-ICP-MS without applying an internal standard: *Chemical Geology*, v. 257, p. 34–43, <https://doi.org/10.1016/j.chemgeo.2008.08.004>.
- Liu, Y.S., Gao, S., Hu, Z.C., Gao, C.G., Zong, K.Q., and Wang, D.B., 2010, Continental and oceanic crust recycling-induced melt-peridotite interactions in the Trans-North China Orogen: U–Pb dating, Hf isotopes and trace elements in zircons from mantle xenoliths: *Journal of Petrology*, v. 51, p. 537–571, <https://doi.org/10.1093/petrology/egp082>.
- Ludwig, K.R., 2003, *Isoplot 3.00, A Geochronological Toolkit for Microsoft Excel*, Berkeley Geochronology Center, Berkeley, CA.
- Segal, I., Halicz, L., and Platzner, I.T., 2003, Accurate isotope ratio measurements of ytterbium by multiple collection inductively coupled plasma mass spectrometry applying erbium and

- hafnium in an improved double external normalization procedure: *Journal of Analytical Atomic Spectrometry*, v. 18, p. 1217–1223, <https://doi.org/10.1039/b307016f>.
- Sláma, J., Košler, J., Condon, D.J., Crowley, J.L., Gerdes, A., Hanchar, J.M., Horstwood, M.S.A., Morris, G.A., Nasdala, L., Norberg, N., Schaltegger, U., Schoene, B., Tubrett, M.N., and Whitehouse, M.J., 2008, Plešovice zircon — A new natural reference material for U–Pb and Hf isotopic microanalysis: *Chemical Geology*, v. 249, p. 1–35, <https://doi.org/10.1016/j.chemgeo.2007.11.005>.
- Sun, S.S., and McDonough, W.F., 1989, Chemical and isotopic systematics of oceanic basalts: implications for mantle composition and processes: *Geological Society of London, Special Publications*, v. 42, no. 1, p. 313–345, <https://doi.org/10.1144/GSL.SP.1989.042.01.19>.
- Wiedenbeck, M., Allé, P., Corfu, F., Griffin, W., Meier, M., Oberli, F., Vonquadt, A., Roddick, J.C., and Speigel, W., 1995, Three natural zircon standards for U–Th–Pb, Lu–Hf, trace element and REE analyses: *Geostandards Newsletter*, v. 19, p. 1–23, <https://doi.org/10.1111/j.1751-908X.1995.tb00147.x>.
- Wu, F.Y., Yang, Y.H., Xie, L.W., Yin, J.H., and Ping, X., 2006, Hf isotopic compositions of the standard zircons and baddeleyites used in U–Pb geochronology: *Chemical Geology*, v. 234, p. 105–126, <https://doi.org/10.1016/j.chemgeo.2006.05.003>.
- Zhang, L., Ren, Z.Y., Nichols, A.R.L., and Liu, J.Q., 2014, Lead isotope analysis of melt inclusions by LA-MC-ICP-MS: *Journal of Analytical Atomic Spectrometry*, v. 29, p. 1393–1405, <https://doi.org/10.1039/C4JA00088A>.
- Zhang, L., Ren, Z.Y., Xia, X.P., Li, J., and Zhang, Z.F., 2015, IsotopeMaker: A Matlab program for isotopic data reduction: *International Journal of Mass Spectrometry*, v. 392, p. 118–124, <https://doi.org/10.1016/j.ijms.2015.09.019>.
- Zhang, L., Ren, Z.Y., Xia, X.P., Wang, C., and Qian, S.P., 2018, An improved U–Pb age dating method for detrital zircon by LA-MC-ICP-MS: *Geochemical Journal*, v. 52, p. 433–439, <https://doi.org/10.2343/geochemj.2.0529>.
